# Supplementary material
Source: publisher site journal article supplement (https://www.dovepress.com/article/451921)
Supplement: Supplementary file 1 [file get_supplementary_file.php]

# Supplementary data


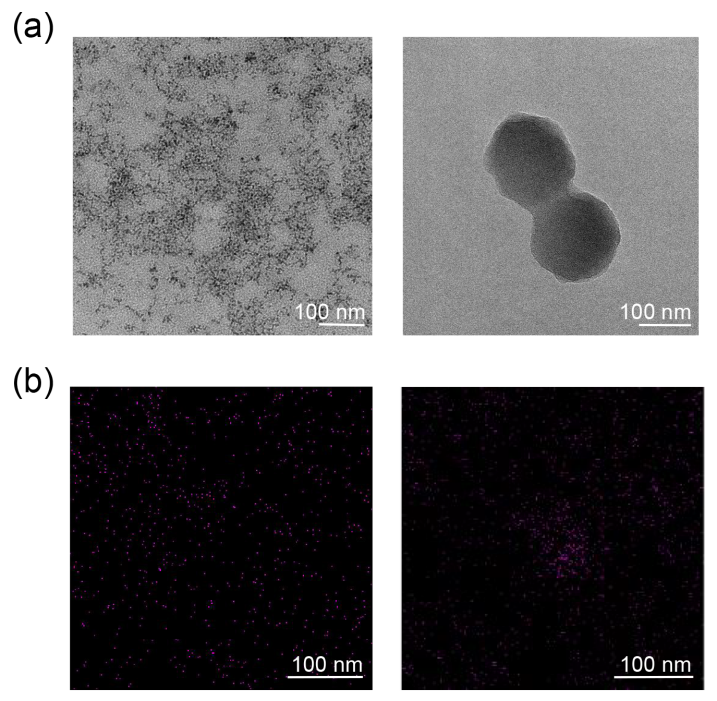


**Figure S1.** (a) Transmission electron microscopy (TEM) images of AG NPs and AGP NPs, scale bar = 100 nm. (b) Elemental mapping of AG NPs and AGP NPs, scale bar = 100 nm.


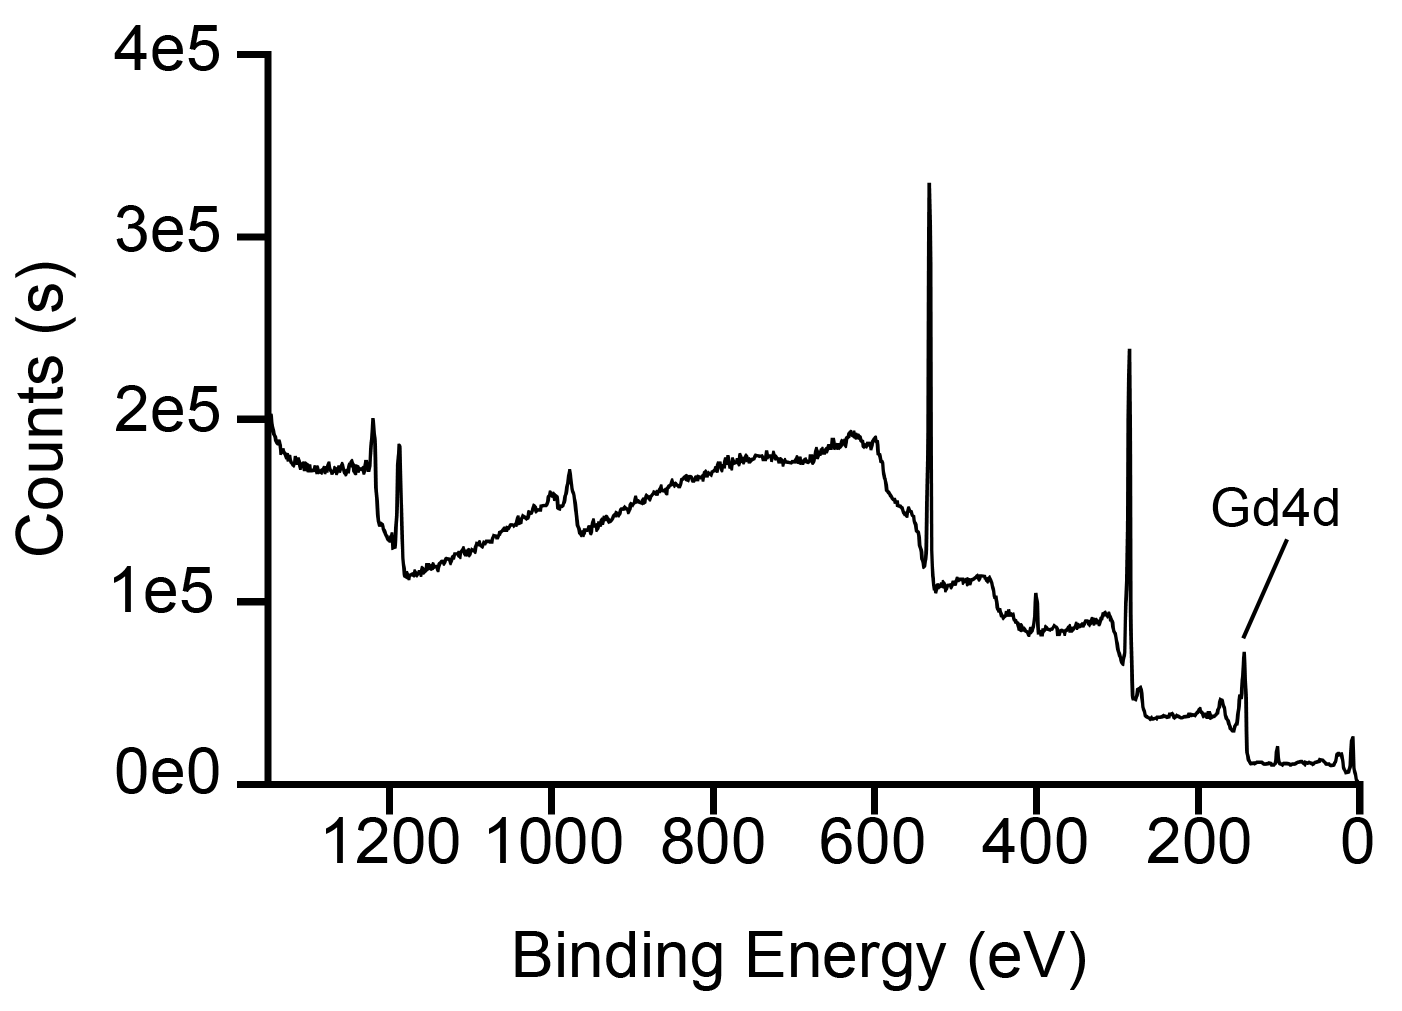


**Figure S2.** XPS spectrum of AGPF NPs.


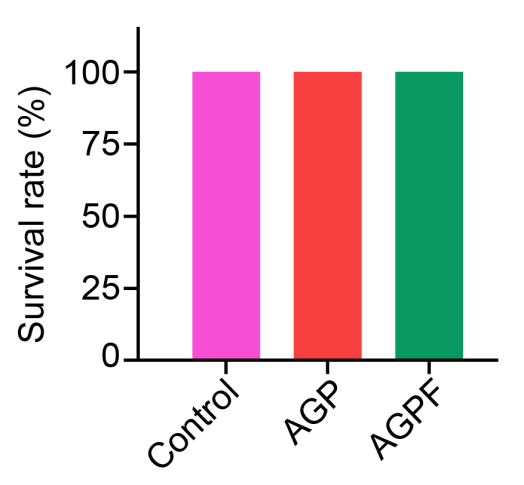


**Figure S3.** Survival rate of the mice.

**
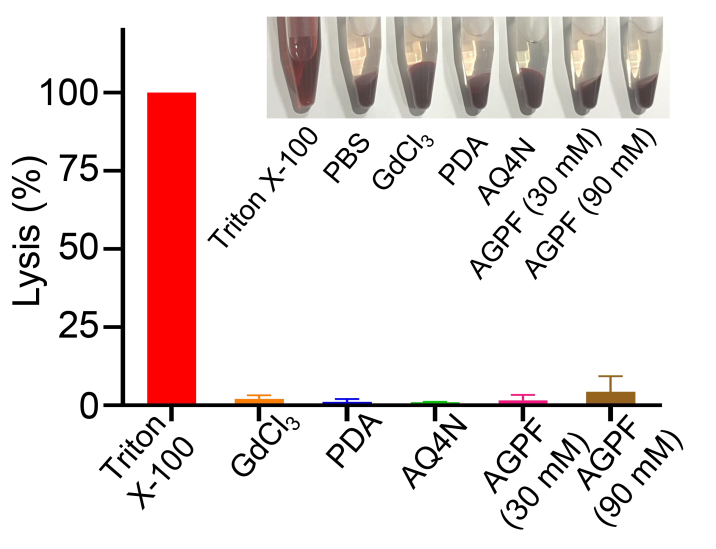
**

**Figure S4.** Pictures and percentage of hemolysis after treatment with different samples.

**
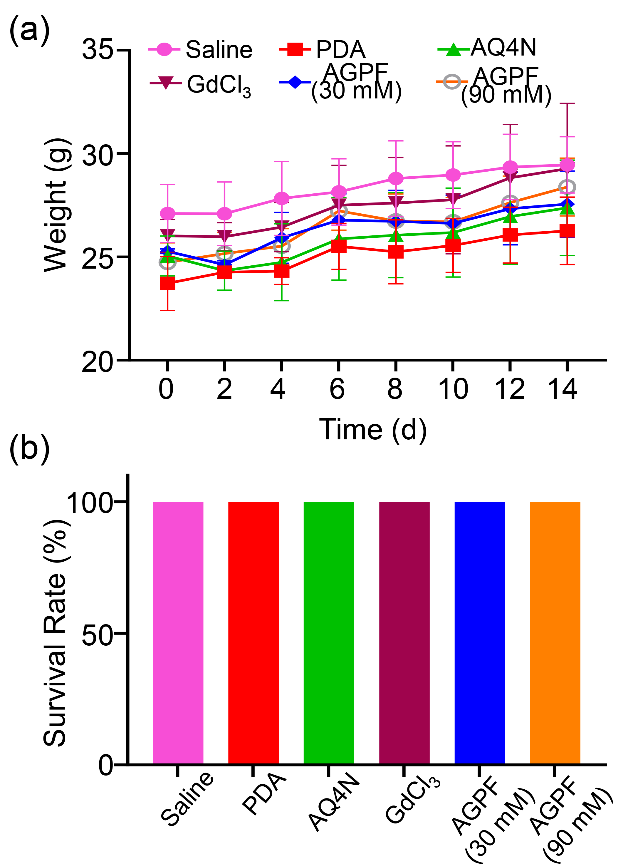
**

**Figure S5.** (a) Weight change in mice after treatment with different samples. (b) Survival rate of mice under treatment with different samples.

**
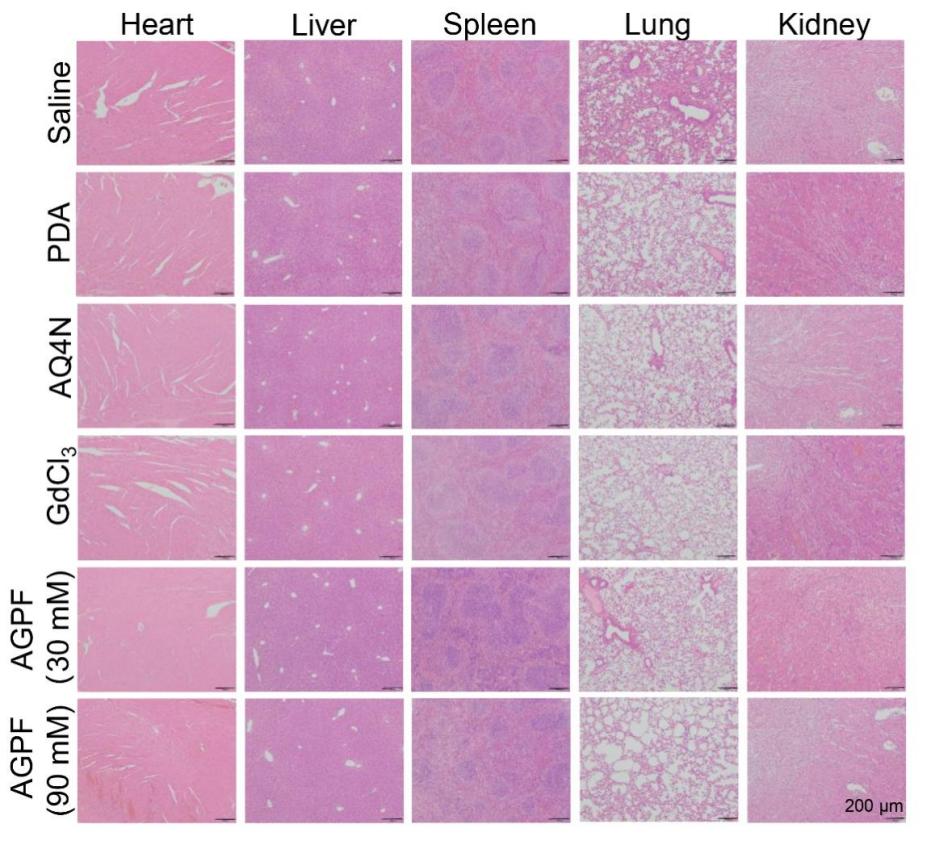
**

**Figure S6.** H&E stain results of different tissues, scale = 200 μm.


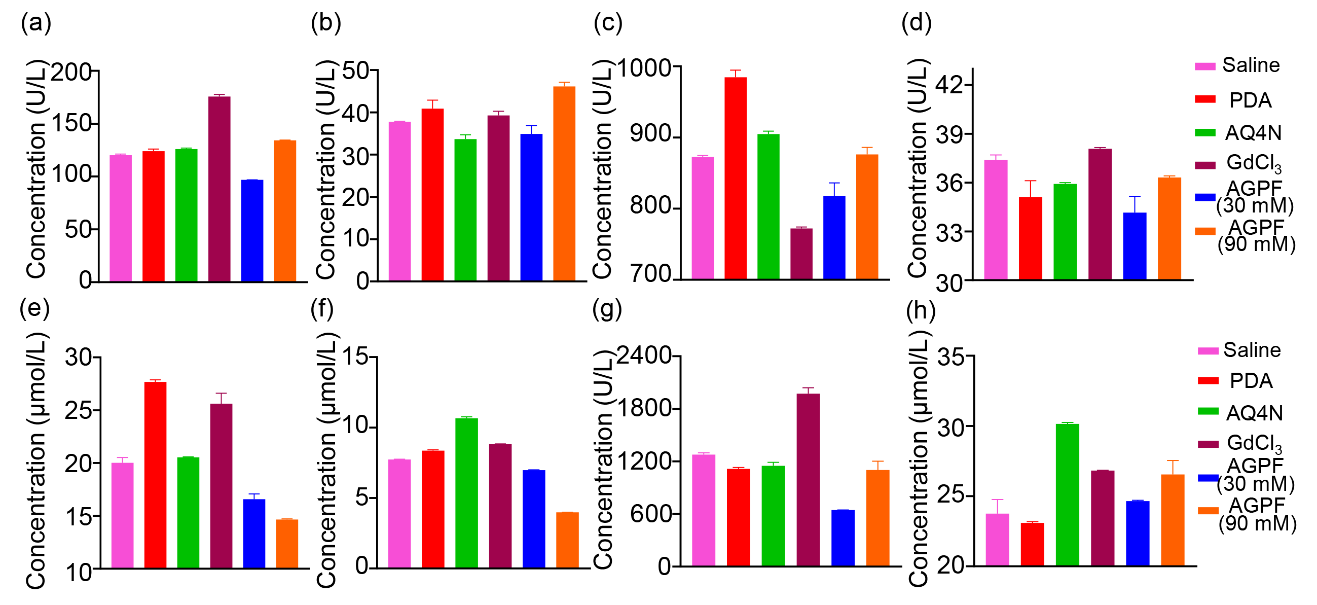


**Figure S7.** Biochemical and *in vivo* toxicity studies of AQ4N-Gd@PDA-FA NPs. (a) AST. (b) ALT. (c) LDH. (d) ALB. (e) T-BIL. (f) UREA. (g) CK. (h) CREA.

**Abbreviations:** AST, aspartate aminotransferase; ALT, aspartate aminotransferase; LDH, lactate dehydrogenase; ALB, albumin; T-BIL, total bilirubin; UREA, carbamide; CK, creatine kinase; CREA, creatinine.


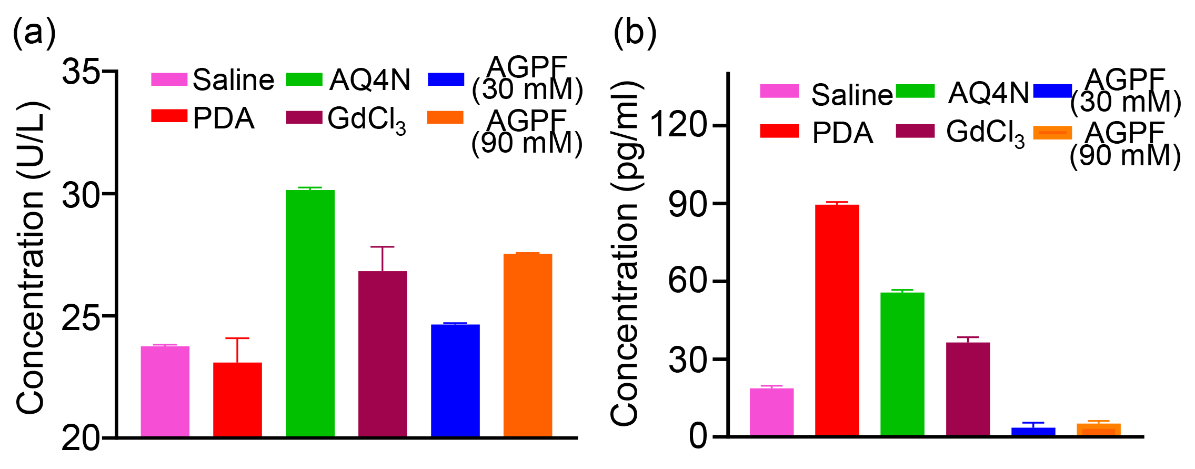


**Figure S8.** Results of ELISA. (a) IL-6. (b) TNF-α.
